# Supplementary material for: Nonsustained atrial tachycardia in 24-hour Holter monitoring: a potential cardiac source of embolism in acute ischemic stroke
Source: PubMed Central journal article supplement — Ann Transl Med. 2022 Apr;10(8):433. doi: 10.21037/atm-21-5245 (PMC9096427; doi:10.21037/atm-21-5245), 2022-04
Supplement: atm-10-08-433-dss.pdf [file atm-10-08-433-dss.pdf]

## Data Sharing Statement

|                     |                                                                                                                                                    |                                                                                                                                    |
|---------------------|----------------------------------------------------------------------------------------------------------------------------------------------------|------------------------------------------------------------------------------------------------------------------------------------|
| <b>Article Info</b> | <a href="https://dx.doi.org/10.21037/atm-21-5245">https://dx.doi.org/10.21037/atm-21-5245</a>                                                      |                                                                                                                                    |
| <b>Item</b>         | <b>Question</b>                                                                                                                                    | <b>Authors' Response<br/>(place "-" if not applicable)</b>                                                                         |
| 1                   | Would you like to share data collected for your study to others?                                                                                   | Yes                                                                                                                                |
| 2                   | If not, would you like to share the reason for your decision?                                                                                      | -                                                                                                                                  |
| 3                   | What data in particular will be shared?                                                                                                            | The clinical data of demographic, laboratory, radiological results will be shared.                                                 |
| 4                   | Any other documents will be share? Such as study protocol, statistical analysis plan, informed consent form, clinical study report, analytic code. | Statistical analysis plan will also be shared if requested.                                                                        |
| 5                   | When will data availability begin?                                                                                                                 | From the publication date.                                                                                                         |
| 6                   | When will data availability end?                                                                                                                   | Two years within the publication date.                                                                                             |
| 7                   | To whom will you share the data?                                                                                                                   | Neurologists and cardiologists who are interested in this study.                                                                   |
| 8                   | For what type of analysis or purpose?                                                                                                              | For analysis to investigate further about nonsustained atrial tachycardia and other cardiac arrhythmia related to ischemic stroke. |
| 9                   | How or where can the data/documents be obtained?                                                                                                   | Emails could be sent to the address below to obtain the shared data: <a href="mailto:gentleboy02@yuhs.ac">gentleboy02@yuhs.ac</a>  |
| 10                  | Any other restrictions?                                                                                                                            | We may balance the potential benefits and risks for each request and then provide the data that could be shared.                   |
