# Supplementary material for: Nonsustained atrial tachycardia in 24-hour Holter monitoring: a potential cardiac source of embolism in acute ischemic stroke
Source: PubMed Central journal article supplement — Ann Transl Med. 2022 Apr;10(8):433. doi: 10.21037/atm-21-5245 (PMC9096427; doi:10.21037/atm-21-5245), 2022-04
Supplement: atm-10-08-433-supplementary.pdf [file atm-10-08-433-supplementary.pdf]

## Supplementary

**Table S1** Comparison of imaging features between patients with and without nonsustained atrial tachycardia by TOAST classification (LAA and cryptogenic)

| Variables                                                   | LAA (n=259) |                  |                | Cryptogenic (n=154) |                 |      |
|-------------------------------------------------------------|-------------|------------------|----------------|---------------------|-----------------|------|
|                                                             | NSAT (n=90) | Non-NSAT (n=169) | P <sup>†</sup> | NSAT (n=78)         | Non-NSAT (n=76) | P    |
| Any embolic feature                                         | 21 [23]     | 23 [13]          | 0.047          | 44 [58]             | 38 [49]         | 0.25 |
| Simultaneous acute lesions in multiple arterial territories | 0 [0]       | 1 [1]            | >0.99          | 29 [38]             | 23 [29]         | 0.26 |
| Isolated acute cortical lesions                             | 0 [0]       | 0 [0]            | –              | 13 [17]             | 10 [13]         | 0.46 |
| Angiographic evidence of cut-off sign or recanalization     | 21 [23]     | 22 [13]          | 0.03           | 2 [3]               | 5 [6]           | 0.44 |

<sup>†</sup>, Chi square test or Fisher's exact test were used. LAA, large artery atherosclerosis; cryptogenic, undetermined-more than two causes or undetermined-negative; other, other determined etiologies; NSAT, nonsustained atrial tachycardia.

**Table S2** Clinical characteristics and laboratory findings between patients with and without imaging findings suggestive of cerebral embolism in acute ischemic stroke patients with nonsustained atrial tachycardia

| Variables                              | All (n=243)      | Embolic (n=66)   | Non-embolic (n=177) | P     |
|----------------------------------------|------------------|------------------|---------------------|-------|
| Age, year                              | 71±11            | 72±10            | 71±11               | 0.65  |
| Female sex, n [%]                      | 103              | 25 [38]          | 78 [44]             | 0.39  |
| Hypertension, n [%]                    | 164              | 48 [73]          | 116 [66]            | 0.29  |
| Diabetes mellitus, n [%]               | 84               | 19 [29]          | 65 [37]             | 0.25  |
| Coronary artery disease, n [%]         | 22               | 4 [6]            | 18 [10]             | 0.32  |
| Dyslipidemia, n [%]                    | 136              | 33 [50]          | 103 [58]            | 0.25  |
| Prior history of TIA/stroke, n [%]     | 35               | 9 [14]           | 26 [15]             | 0.84  |
| Current smoker, n [%]                  | 91               | 27 [41]          | 64 [36]             | 0.50  |
| Initial NIHSS score                    | 2 [1–5]          | 3 [1–9]          | 2 [1–4]             | 0.002 |
| CHA <sub>2</sub> DS <sub>2</sub> -VASc | 3 [2–4]          | 3 [2–4]          | 3 [2–4]             | 0.88  |
| LV EF, %                               | 67 [62–71]       | 67 [63–71]       | 67 [62–72]          | 0.90  |
| LA index, mL/m <sup>2</sup>            | 27 [22–34]       | 27 [23–35]       | 27 [22–34]          | 0.83  |
| Total APB, n                           | 12 [5–24]        | 15 [6–23]        | 10 [5–26]           | 0.44  |
| Longest run of APB, n                  | 5 [3–9]          | 5 [3–9]          | 5 [3–8]             | 0.46  |
| D-dimer, mcg/mL                        | 0.57 [0.26–1.29] | 0.71 [0.46–2.06] | 0.56 [0.25–1.16]    | 0.18  |
| Total cholesterol, mg/dL               | 175±41           | 169±37           | 177±42              | 0.18  |
| LDL-cholesterol, mg/dL                 | 118±33           | 112±29           | 120±35              | 0.11  |
| HDL-cholesterol, mg/dL                 | 44±12            | 45±14            | 44±11               | 0.36  |
| Triglyceride, mg/dL                    | 102 [76–136]     | 91 [77–123]      | 106 [76–140]        | 0.16  |

TIA, transient ischemic attack; NIHSS, National Institutes of Health Stroke Scale; CHA<sub>2</sub>DS<sub>2</sub>-VASc, congestive heart failure, hypertension, age ≥75 years, diabetes, prior stroke or TIA, vascular disease, age 65–74 years, sex; LV EF, left ventricular ejection fraction; LA, left atrium; APB, atrial premature beat; LDL, low-density lipoprotein; HDL, high-density lipoprotein.
